# Supplementary material for: RIblast: an ultrafast RNA–RNA interaction prediction system based on a seed-and-extension approach
Source: PubMed Central journal article supplement — Bioinformatics. 2017 Apr 28;33(17):2666–74. doi: 10.1093/bioinformatics/btx287 (PMC5860064; doi:10.1093/bioinformatics/btx287), 2017-04-28
Supplement: btx287_supplementary_materials.pdf [file btx287_supplementary_materials.pdf]

Supplementary Materials for  
RIblast: An ultrafast RNA-RNA interaction prediction system  
for comprehensive lncRNA interaction analysis

Tsukasa Fukunaga and Michiaki Hamada

Supplementary Figures

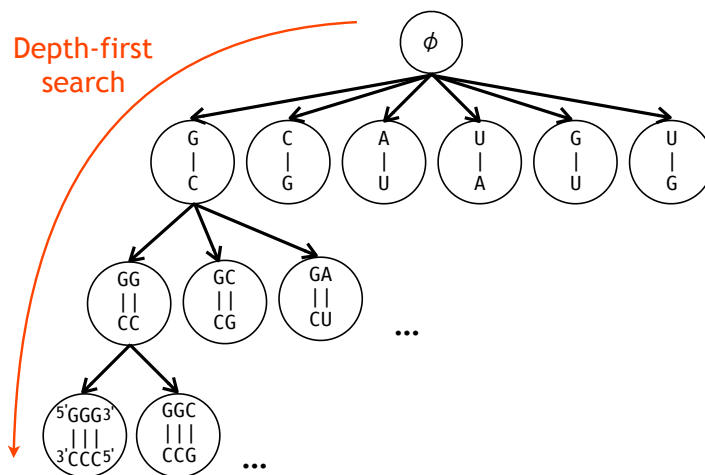

Fig. S1 Schematic illustration of seed search algorithm. RIblast detects seeds using depth-first search.

---

**Algorithm 1** *SeedSearch()*

---

$S_q \leftarrow$  a query RNA sequence  
 $S_{db} \leftarrow$  reversed and concatenated target RNA sequences  
 $SA_q \leftarrow \text{ConstructionSuffixArray}(S_q)$   
 $SA_{db} \leftarrow \text{ConstructionSuffixArray}(S_{db})$   
 $\text{SeedSearchCore}(S_q, SA_q, \{\}, S_{db}, SA_{db}, \{\}, 0, |S_q| - 1, 0, |S_{db}| - 1, 0, 0)$

---

---

**Algorithm 2** *SeedSearchCore( $S_q, SA_q, seed_q, S_{db}, SA_{db}, seed_{db}, sp_q, ep_q, sp_{db}, ep_{db}, energy, length$ )*

---

**if**  $length < length_{max}$  **then**  
  **for all**  $c \in \{\{G, C\}, \{C, G\}, \{A, U\}, \{U, A\}, \{G, U\}, \{U, G\}\}$  **do**  
     $sp, ep \leftarrow \text{SASearchNextCharacter}(S_q, SA_q, sp_q, ep_q, c_0, length)$   
     $sp', ep' \leftarrow \text{SASearchNextCharacter}(S_{db}, SA_{db}, sp_{db}, ep_{db}, c_1, length)$   
    **if**  $sp \leq ep \ \&\& \ sp' \leq ep'$  **then**  
      **if**  $length > 0$  **then**  
         $energy \leftarrow energy + \text{CalcStackingEnergy}(c_0, c_1, seed_q[length-1], seed_{db}[length-1])$   
      **end if**  
      **if**  $energy < \text{threshold } T_1 \ \&\& \ length \geq \delta$  **then**  
        store  $sp, ep, sp', ep'$   
      **else**  
         $seed_q.PushBack(c_0), seed_{db}.PushBack(c_1)$   
         $\text{SeedSearchCore}(S_q, SA_q, seed_q, S_{db}, SA_{db}, seed_{db}, sp, ep, sp', ep', energy, length + 1)$   
      **end if**  
    **end if**  
  **end for**  
**end if**  
 $seed_q.PopBack, seed_{db}.PopBack$

---

Fig. S2 Pseudocode of seed search algorithm. The *ConstructionSuffixArray* function generates a suffix array from an RNA sequence in linear-time order to sequence length.  $length_{max}$  is the max seed length. The *SASearchNextCharacter* function returns the indices of the new extended string on a suffix array by binary search. The *CalcStackingEnergy* function returns the energies of stack consisting of two base pairs.  $seed_q$  and  $seed_{db}$  are temporary seeds on query and database, respectively. If extended strings are detected, the hybridization energies is smaller than  $T_1$  and the length is  $\delta$  and more, the indices of the strings on suffix arrays are stored.

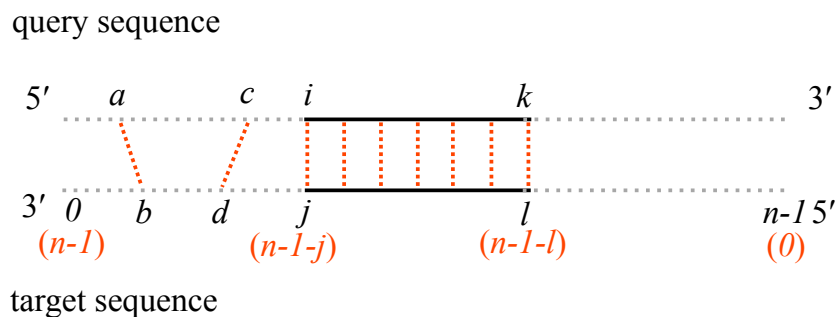

Fig. S3 Schematic illustration of the calculation of interaction energy in gapped extension. The pair of black solid lines represent an interaction after gapless extension. The gray dotted lines are RNA sequences that does not form inter-molecular base pair in gapless extension. The red dotted lines represent inter-molecular base pairs. The black indices are the indices for calculation of hybridization energy, and the red indices are the indices for obtaining accessible energy. Note that two indices are different in target sequences because target sequences are reversed for the seed search after calculation of accessible energy.

## Supplementary Tables

Table S1 Dependence of the MCC values of bacterial sRNA basepair prediction on  $T_1$  and  $X$  parameters when the energy parameter was Turner parameter

| $T_1$ | $X$  |      |      |      |             |      |      |
|-------|------|------|------|------|-------------|------|------|
|       | 10   | 12   | 14   | 16   | 18          | 20   | 22   |
| -13.0 | 0.53 | 0.54 | 0.54 | 0.55 | 0.55        | 0.55 | 0.55 |
| -12.5 | 0.54 | 0.56 | 0.56 | 0.58 | 0.58        | 0.58 | 0.58 |
| -12.0 | 0.55 | 0.56 | 0.57 | 0.59 | 0.59        | 0.58 | 0.59 |
| -11.5 | 0.53 | 0.56 | 0.56 | 0.58 | 0.58        | 0.58 | 0.57 |
| -11.0 | 0.54 | 0.58 | 0.58 | 0.60 | 0.60        | 0.60 | 0.59 |
| -10.5 | 0.55 | 0.59 | 0.58 | 0.59 | 0.59        | 0.59 | 0.58 |
| -10.0 | 0.56 | 0.58 | 0.58 | 0.59 | <b>0.61</b> | 0.60 | 0.60 |
| -9.5  | 0.56 | 0.58 | 0.58 | 0.59 | 0.60        | 0.59 | 0.59 |
| -9.0  | 0.57 | 0.58 | 0.57 | 0.58 | 0.60        | 0.59 | 0.60 |

The row and the column indicates  $X$  values and  $T_1$  values, respectively.  $T_1$  is a threshold energy for score-based seed detection, and  $X$  is a threshold length for extension termination. The bold values mean the best MCC score.

Table S2 Dependence of the MCC values of bacterial sRNA basepair prediction on  $T_1$  and  $X$  parameters when the energy parameter was Andronescu parameter

| $T_1$ | $X$    |      |      |             |      |      |      |
|-------|--------|------|------|-------------|------|------|------|
|       | $X=10$ | 12   | 14   | 16          | 18   | 20   | 22   |
| -6.5  | 0.64   | 0.65 | 0.65 | 0.66        | 0.67 | 0.66 | 0.67 |
| -6.25 | 0.63   | 0.64 | 0.64 | 0.65        | 0.66 | 0.66 | 0.66 |
| -6.0  | 0.65   | 0.66 | 0.65 | <b>0.67</b> | 0.67 | 0.67 | 0.65 |
| -5.75 | 0.65   | 0.66 | 0.65 | 0.67        | 0.67 | 0.67 | 0.65 |
| -5.5  | 0.65   | 0.66 | 0.65 | 0.66        | 0.67 | 0.67 | 0.65 |
| -5.25 | 0.65   | 0.66 | 0.65 | 0.66        | 0.67 | 0.67 | 0.65 |
| -5.0  | 0.65   | 0.66 | 0.65 | 0.66        | 0.67 | 0.67 | 0.65 |
| -4.75 | 0.65   | 0.66 | 0.65 | 0.66        | 0.67 | 0.67 | 0.65 |
| -4.5  | 0.65   | 0.66 | 0.65 | 0.66        | 0.67 | 0.67 | 0.65 |

The row and the column indicates  $X$  values and  $T_1$  values, respectively.  $T_1$  is a threshold energy for score-based seed detection, and  $X$  is a threshold length for extension termination. The bold values mean the best MCC score.

Table S3 Dependence of the MCC values of bacterial sRNA basepair prediction on  $Y$  parameters

| $Y$ | Turner parameter | Andronescu parameter |
|-----|------------------|----------------------|
| 3   | 0.61             | 0.67                 |
| 4   | 0.61             | 0.67                 |
| 5   | 0.61             | 0.67                 |
| 6   | 0.61             | 0.67                 |
| 7   | 0.60             | 0.67                 |

The row and the column indicates the kinds of energy parameter and  $Y$  values, respectively.  $Y$  is a threshold length for extension termination in gapless extension step.

Table S4 Dependence of the MCC values of bacterial sRNA basepair prediction on  $W$  parameters

| $W$ | Turner parameter | Andronescu parameter |
|-----|------------------|----------------------|
| 30  | 0.60             | 0.59                 |
| 50  | 0.57             | 0.64                 |
| 70  | 0.61             | 0.67                 |
| 100 | 0.61             | 0.63                 |
| 150 | 0.59             | 0.63                 |

The row and the column indicates the kinds of energy parameter and  $W$  values, respectively.  $W$  is the constraint of maximal distance between the bases that may form base pairs.

Table S5 Dependence of the MCC values of bacterial sRNA basepair prediction on  $W$  parameters

| $\delta$ | Turner parameter | Andronescu parameter |
|----------|------------------|----------------------|
| 3        | 0.58             | 0.65                 |
| 4        | 0.60             | 0.66                 |
| 5        | 0.61             | 0.67                 |
| 6        | 0.57             | 0.64                 |
| 7        | 0.59             | 0.61                 |

The row and the column indicates the kinds of energy parameter and  $\delta$  values, respectively.  $\delta$  is a parameter for accessibility approximation and determination of minimum seed length.

Table S6 TINCR target prediction performance for MINENERGY sorting

| Software             | Threshold about the number of interacted segments |              |              |              |              |
|----------------------|---------------------------------------------------|--------------|--------------|--------------|--------------|
|                      | 1                                                 | 2            | 3            | 4            | 5            |
| LAST                 | <b>0.583</b>                                      | <b>0.587</b> | <b>0.578</b> | 0.593        | 0.570        |
| Terai's pipeline     | 0.565                                             | 0.557        | 0.557        | 0.579        | <b>0.577</b> |
| RIblast (Turner)     | 0.573                                             | 0.560        | 0.566        | 0.598        | 0.559        |
| RIblast (Andronescu) | 0.581                                             | 0.567        | 0.572        | <b>0.600</b> | 0.574        |

The row is a threshold about the number of interacted segments, which defines the positive dataset.

The column shows each software. The bold values mean the best AUROC score.

Table S7 TINCR target prediction performance of Riblast with Turner parameter for SUMENERGY sorting

| interaction energy threshold | Threshold about the number of interacted segments |              |              |              |              |
|------------------------------|---------------------------------------------------|--------------|--------------|--------------|--------------|
|                              | 1                                                 | 2            | 3            | 4            | 5            |
| 0                            | 0.618                                             | 0.622        | 0.630        | 0.662        | 0.647        |
| -1                           | 0.618                                             | 0.622        | 0.630        | 0.662        | 0.647        |
| -2                           | 0.618                                             | 0.622        | 0.630        | 0.662        | 0.647        |
| -3                           | 0.618                                             | 0.623        | 0.631        | 0.662        | 0.648        |
| -4                           | 0.618                                             | 0.623        | 0.631        | 0.663        | 0.648        |
| -5                           | 0.619                                             | 0.625        | 0.633        | 0.665        | 0.650        |
| -6                           | 0.621                                             | 0.627        | 0.635        | 0.667        | 0.652        |
| -7                           | 0.623                                             | 0.630        | 0.638        | 0.671        | 0.655        |
| -8                           | 0.627                                             | 0.634        | 0.642        | 0.676        | 0.659        |
| -9                           | 0.632                                             | 0.639        | 0.646        | 0.682        | 0.664        |
| -10                          | 0.639                                             | 0.646        | 0.652        | 0.688        | 0.668        |
| -11                          | 0.646                                             | 0.653        | 0.657        | 0.694        | 0.674        |
| -12                          | 0.652                                             | 0.658        | 0.661        | 0.699        | 0.677        |
| -13                          | 0.657                                             | 0.663        | 0.665        | 0.703        | 0.680        |
| -14                          | 0.659                                             | 0.666        | <b>0.668</b> | 0.706        | 0.682        |
| -15                          | 0.661                                             | <b>0.667</b> | 0.667        | <b>0.707</b> | <b>0.682</b> |
| -16                          | <b>0.662</b>                                      | <b>0.667</b> | 0.667        | 0.706        | 0.681        |
| -17                          | 0.661                                             | 0.665        | 0.666        | 0.706        | 0.679        |
| -18                          | 0.658                                             | 0.662        | 0.663        | 0.704        | 0.674        |
| -19                          | 0.656                                             | 0.658        | 0.659        | 0.700        | 0.672        |

The row is a threshold about the number of interacted segments, which defines the positive dataset. The column shows the interaction energy threshold for SUMENERGY sorting. The bold values mean the best AUROC score.

Table S8 TINCR target prediction performance of Riblast with Andronescu parameter for SUMENERGY sorting

| interaction energy threshold | Threshold about the number of interacted segments |              |              |              |              |
|------------------------------|---------------------------------------------------|--------------|--------------|--------------|--------------|
|                              | 1                                                 | 2            | 3            | 4            | 5            |
| 0                            | 0.613                                             | 0.618        | 0.627        | 0.659        | 0.646        |
| -0.5                         | 0.613                                             | 0.618        | 0.627        | 0.659        | 0.646        |
| -1.0                         | 0.613                                             | 0.618        | 0.627        | 0.659        | 0.646        |
| -1.5                         | 0.613                                             | 0.618        | 0.627        | 0.659        | 0.646        |
| -2.0                         | 0.613                                             | 0.618        | 0.627        | 0.659        | 0.646        |
| -2.5                         | 0.614                                             | 0.619        | 0.628        | 0.661        | 0.647        |
| -3.0                         | 0.615                                             | 0.620        | 0.630        | 0.663        | 0.649        |
| -3.5                         | 0.617                                             | 0.623        | 0.632        | 0.666        | 0.651        |
| -4.0                         | 0.621                                             | 0.627        | 0.636        | 0.671        | 0.654        |
| -4.5                         | 0.627                                             | 0.632        | 0.640        | 0.676        | 0.659        |
| -5.0                         | 0.633                                             | 0.639        | 0.645        | 0.683        | 0.664        |
| -5.5                         | 0.641                                             | 0.646        | 0.651        | 0.689        | 0.668        |
| -6.0                         | 0.648                                             | 0.652        | 0.656        | 0.694        | 0.672        |
| -6.5                         | 0.654                                             | 0.657        | 0.660        | 0.699        | 0.676        |
| -7.0                         | 0.658                                             | 0.662        | 0.664        | 0.703        | 0.680        |
| -7.5                         | 0.662                                             | 0.666        | 0.666        | 0.705        | 0.680        |
| -8.0                         | <b>0.664</b>                                      | <b>0.667</b> | <b>0.667</b> | <b>0.707</b> | <b>0.682</b> |
| -8.5                         | <b>0.664</b>                                      | 0.666        | <b>0.667</b> | 0.706        | 0.681        |
| -9.0                         | <b>0.664</b>                                      | 0.665        | 0.665        | 0.704        | 0.678        |
| -9.5                         | 0.662                                             | 0.662        | 0.663        | 0.702        | 0.676        |

The row is a threshold about the number of interacted segments, which defines the positive dataset. The column shows the interaction energy threshold for SUMENERGY sorting. The bold values mean the best AUROC score.

Table S9 TINCR target prediction performance of LAST for SUMENERGY sorting

| interaction energy threshold | Threshold about the number of interacted segments |              |              |              |              |
|------------------------------|---------------------------------------------------|--------------|--------------|--------------|--------------|
|                              | 1                                                 | 2            | 3            | 4            | 5            |
| -16                          | 0.637                                             | 0.631        | 0.632        | 0.659        | 0.636        |
| -17                          | 0.639                                             | 0.634        | <b>0.635</b> | 0.660        | 0.636        |
| -18                          | 0.639                                             | 0.635        | 0.633        | <b>0.662</b> | <b>0.638</b> |
| -19                          | 0.641                                             | 0.637        | 0.630        | 0.661        | 0.636        |
| -20                          | 0.642                                             | <b>0.641</b> | <b>0.635</b> | 0.664        | 0.637        |
| -21                          | <b>0.643</b>                                      | <b>0.641</b> | 0.629        | 0.660        | 0.635        |
| -22                          | 0.642                                             | 0.640        | 0.624        | 0.648        | 0.623        |
| -23                          | 0.642                                             | 0.640        | 0.627        | 0.648        | 0.622        |
| -24                          | 0.637                                             | 0.636        | 0.627        | 0.644        | 0.625        |
| -25                          | 0.630                                             | 0.632        | 0.618        | 0.634        | 0.614        |
| -26                          | 0.625                                             | 0.626        | 0.613        | 0.638        | 0.607        |
| -27                          | 0.620                                             | 0.623        | 0.608        | 0.630        | 0.599        |
| -28                          | 0.612                                             | 0.618        | 0.607        | 0.624        | 0.605        |
| -29                          | 0.597                                             | 0.610        | 0.601        | 0.625        | 0.611        |
| -30                          | 0.583                                             | 0.598        | 0.584        | 0.604        | 0.600        |

The row is a threshold about the number of interacted segments, which defines the positive dataset. The column shows the interaction energy threshold for SUMENERGY sorting. The bold values mean the best AUROC score.

Table S10 Dependence of the AUROC scores and the calculation time of TINCR target prediction on  $T_2$  parameter when the energy parameter was Turner parameter

| $T_2$ | Calculation time (s) | Threshold about the number of interacted segments |       |       |       |       |
|-------|----------------------|---------------------------------------------------|-------|-------|-------|-------|
|       |                      | 1                                                 | 2     | 3     | 4     | 5     |
| 0     | 14085                | 0.662                                             | 0.667 | 0.667 | 0.706 | 0.681 |
| -2    | 12361                | 0.661                                             | 0.667 | 0.667 | 0.706 | 0.681 |
| -4    | 7817                 | 0.660                                             | 0.665 | 0.665 | 0.705 | 0.680 |
| -6    | 5862                 | 0.658                                             | 0.663 | 0.662 | 0.703 | 0.680 |
| -8    | 3778                 | 0.655                                             | 0.660 | 0.660 | 0.701 | 0.677 |
| -10   | 3896                 | 0.654                                             | 0.658 | 0.661 | 0.701 | 0.677 |
| -12   | 1884                 | 0.652                                             | 0.654 | 0.659 | 0.697 | 0.673 |
| -14   | 1204                 | 0.648                                             | 0.648 | 0.654 | 0.693 | 0.668 |
| -16   | 1073                 | 0.638                                             | 0.636 | 0.637 | 0.672 | 0.656 |

The row is the calculation time and a threshold about the number of interacted segments, which defines the positive dataset. The column shows  $T_2$  values, which was the exclusion threshold energy after gapless extension for speeding up the computation.



Table S11 Dependence of the AUROC scores and the calculation time of TINCR target prediction on  $T_2$  parameter when the energy parameter was Andronescu parameter

| $T_2$ | Calculation time (s) | Threshold about the number of interacted segments |       |       |       |       |
|-------|----------------------|---------------------------------------------------|-------|-------|-------|-------|
|       |                      | 1                                                 | 2     | 3     | 4     | 5     |
| 0     | 11669                | 0.664                                             | 0.667 | 0.667 | 0.707 | 0.682 |
| -1    | 10597                | 0.663                                             | 0.667 | 0.667 | 0.707 | 0.682 |
| -2    | 8483                 | 0.663                                             | 0.667 | 0.667 | 0.707 | 0.682 |
| -3    | 5771                 | 0.662                                             | 0.666 | 0.667 | 0.707 | 0.683 |
| -4    | 3486                 | 0.660                                             | 0.663 | 0.665 | 0.706 | 0.681 |
| -5    | 2145                 | 0.656                                             | 0.659 | 0.662 | 0.701 | 0.676 |
| -6    | 1301                 | 0.653                                             | 0.656 | 0.660 | 0.697 | 0.674 |
| -7    | 1591                 | 0.650                                             | 0.654 | 0.657 | 0.695 | 0.672 |
| -8    | 803                  | 0.649                                             | 0.651 | 0.655 | 0.690 | 0.668 |

The row is the calculation time and a threshold about the number of interacted segments, which defines the positive dataset. The column shows  $T_2$  values, which was the exclusion threshold energy after gapless extension for speeding up the computation.
